# Supplementary material
Source: PubMed Central journal article supplement (PMC2857928)
Supplement: NIHMS182798-supplement-Appendix.pdf [file NIHMS182798-supplement-Appendix.pdf]

## **Appendix A. Databases and search strategies**

### Databases:

MEDLINE 1966 – December 2008

EMBASE 1974 – December 2008

CINHAL 1982 – December 2008

EBM Reviews: Cochrane Database of Systemic Reviews and Cochrane Central Register of Controlled  
Clinical Trials - Last Quarter 2008

ACP Journal Club: 1991 - December 2008

Database of Abstracts of Reviews of Effects - Last Quarter 2008

### Search strategies:

#### Breast irradiation

1. (child\$ or adol\$)
2. neoplasm
3. 1 and 2
4. 3 and breast.mp.
5. 4 and radiat\$.mp
6. Neoplasms, Second Primary/
7. 3 and 6

#### Hodgkin's lymphoma

1. Hodgkin\$.mp.
2. Neoplasms, Second Primary/
3. 1 and 2

**Appendix B.** Summary of literature search and review process by key question

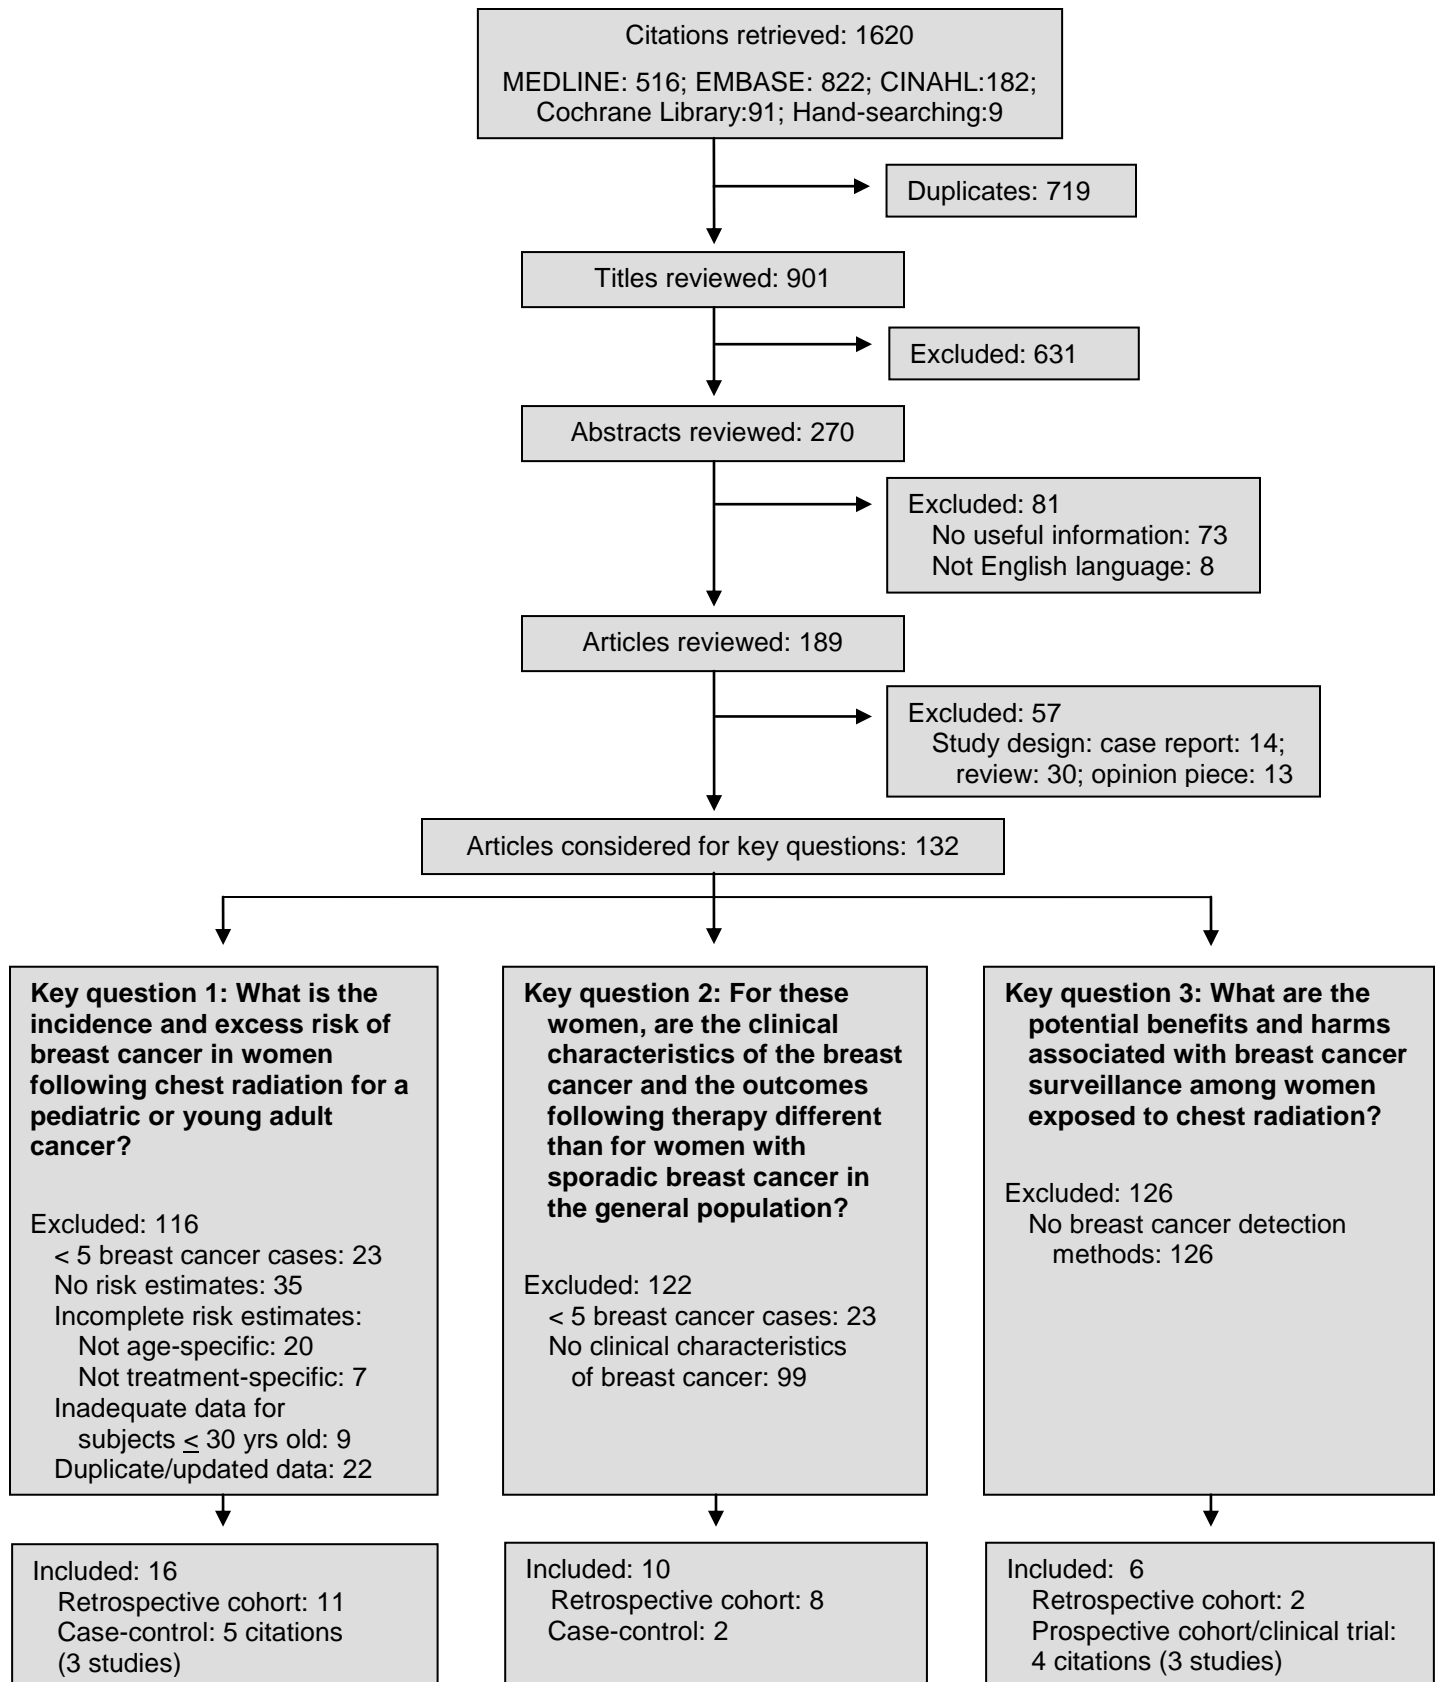

Appendix C Table 1a. Itemized study reporting criteria according to the STROBE\* statement check list for observational single institution cohort studies utilized in Question 1: "What is the incidence and excess risk of breast cancer following chest radiation for a pediatric or young adult cancer?"

| Item | Item Description | Alm El-Din<br>2009 (9) | Hancock<br>1993 (12) | Wolden<br>1998 (17) |
|------|------------------|------------------------|----------------------|---------------------|
| 1    | a                | 1                      | 1                    | 0                   |
|      | b                | 1                      | 1                    | 1                   |
| 2    |                  | 1                      | 1                    | 1                   |
| 3    |                  | 1                      | 1                    | 0                   |
| 4    |                  | 1                      | 1                    | 1                   |
| 5    |                  | 1                      | 1                    | 1                   |
| 6    | a                | 1                      | 1                    | 1                   |
|      | b                | N/A                    | N/A                  | N/A                 |
| 7    |                  | 0                      | 0                    | 1                   |
| 8    |                  | 0                      | 1                    | 1                   |
| 9    |                  | 0                      | 0                    | 0                   |
| 10   |                  | 0                      | 1                    | 1                   |
| 11   |                  | 0                      | 1                    | 0                   |
| 12   | a                | 1                      | 1                    | 1                   |
|      | b                | 1                      | 1                    | 1                   |
|      | c                | 0                      | 0                    | 0                   |
|      | d                | 0                      | 0                    | 1                   |
|      | e                | N/A                    | N/A                  | N/A                 |
| 13   | a                | 0                      | 1                    | 1                   |
|      | b                | 0                      | 1                    | 1                   |
|      | c                | 0                      | 0                    | 0                   |
| 14   | a                | 1                      | 0                    | 1                   |
|      | b                | 1                      | 0                    | 0                   |
|      | c                | 1                      | 1                    | 1                   |
| 15   |                  | 1                      | 1                    | 1                   |
| 16   | a                | 1                      | 1                    | 1                   |
|      | b                | 1                      | 1                    | 1                   |
|      | c                | 0                      | 1                    | 1                   |
| 17   |                  | 1                      | 1                    | 1                   |
| 18   |                  | 1                      | 1                    | 1                   |
| 19   |                  | 0                      | 1                    | 1                   |
| 20   |                  | 1                      | 1                    | 1                   |
| 21   |                  | 0                      | 0                    | 0                   |
| 22   |                  | 1                      | N/A                  | 1                   |
| Sum  |                  | 19/32                  | 24/31                | 24/32               |

\* Itemized reporting criteria in the Strengthening the Reporting of Observational Studies in Epidemiology (STROBE) statement checklist have been described in detail previously (7,8)

Appendix C Table 1b. Itemized study reporting criteria according to the STROBE\* statement check list for observational multiple institution cohort studies utilized in Question 1: "What is the incidence and excess risk of breast cancer following chest radiation for a pediatric or young adult cancer?"

| Item | Item Description | Bhatia<br>2003 (10) | Constine<br>2008 (18) | Guibout<br>2005 (11) | Kenney<br>2004 (13) | Ng<br>2002 (15) |
|------|------------------|---------------------|-----------------------|----------------------|---------------------|-----------------|
| 1    | a                | 1                   | 0                     | 1                    | 1                   | 0               |
|      | b                | 1                   | 1                     | 1                    | 1                   | 1               |
| 2    |                  | 1                   | 1                     | 1                    | 1                   | 1               |
| 3    |                  | 1                   | 1                     | 1                    | 1                   | 1               |
| 4    |                  | 1                   | 1                     | 1                    | 1                   | 1               |
| 5    |                  | 1                   | 1                     | 1                    | 1                   | 1               |
| 6    | a                | 1                   | 1                     | 1                    | 1                   | 1               |
|      | b                | N/A                 | N/A                   | N/A                  | N/A                 | N/A             |
| 7    |                  | 1                   | 1                     | 1                    | 1                   | 1               |
| 8    |                  | 1                   | 1                     | 1                    | 1                   | 1               |
| 9    |                  | 0                   | 0                     | 0                    | 0                   | 0               |
| 10   |                  | 1                   | 1                     | 1                    | 1                   | 1               |
| 11   |                  | 1                   | 1                     | 1                    | 1                   | 0               |
| 12   | a                | 1                   | 1                     | 1                    | 1                   | 1               |
|      | b                | 1                   | 1                     | 1                    | 1                   | 1               |
|      | c                | 0                   | 0                     | 0                    | 0                   | 0               |
|      | d                | 1                   | 0                     | 1                    | 0                   | 1               |
|      | e                | 1                   | N/A                   | N/A                  | N/A                 | N/A             |
| 13   | a                | 0                   | 0                     | 1                    | 1                   | 1               |
|      | b                | 0                   | 0                     | 0                    | 0                   | 0               |
|      | c                | 0                   | 0                     | 0                    | 0                   | 0               |
| 14   | a                | 1                   | 1                     | 1                    | 1                   | 1               |
|      | b                | 1                   | 1                     | 1                    | 1                   | 1               |
|      | c                | 1                   | 1                     | 1                    | 1                   | 1               |
| 15   |                  | 1                   | 1                     | 1                    | 1                   | 1               |
| 16   | a                | 1                   | 1                     | 1                    | 1                   | 1               |
|      | b                | 1                   | 1                     | 1                    | 1                   | 1               |
|      | c                | 1                   | 1                     | 1                    | 0                   | 1               |
| 17   |                  | 1                   | 1                     | 1                    | 1                   | 1               |
| 18   |                  | 1                   | 1                     | 1                    | 1                   | 1               |
| 19   |                  | 1                   | 1                     | 1                    | 1                   | 1               |
| 20   |                  | 1                   | 1                     | 1                    | 1                   | 1               |
| 21   |                  | 0                   | 0                     | 1                    | 1                   | 1               |
| 22   |                  | 0                   | 0                     | 1                    | 1                   | 1               |
| Sum  |                  | 26/33               | 23/32                 | 28/32                | 26/32               | 26/32           |

Appendix C Table 1c. Itemized study reporting criteria according to the STROBE\* statement check list for observational population-based cohort studies utilized in Question 1: "What is the incidence and excess risk of breast cancer following chest radiation for a pediatric or young adult cancer?"

| Item | Item Description                                                                                                                         | De Bruin<br>2009 (19) | Metayer<br>2000 (14) | Taylor<br>2007 (16) |
|------|------------------------------------------------------------------------------------------------------------------------------------------|-----------------------|----------------------|---------------------|
| 1    | a                                                                                                                                        | 1                     | 1                    | 1                   |
|      | b                                                                                                                                        | 1                     | 1                    | 1                   |
| 2    | Explain the scientific background and rationale for the investigation being reported.                                                    | 1                     | 1                    | 1                   |
| 3    | State specific objectives including any prespecified hypotheses.                                                                         | 1                     | 1                    | 1                   |
| 4    | Present key elements of study design early in the paper.                                                                                 | 1                     | 1                    | 1                   |
| 5    | Describe the setting, locations, and relevant dates, including periods of recruitment, exposure, follow-up and data.                     | 1                     | 1                    | 1                   |
| 6    | a                                                                                                                                        | 1                     | 1                    | 1                   |
|      | b                                                                                                                                        | N/A                   | N/A                  | N/A                 |
| 7    | Clearly define all outcomes, exposures, predictors, potential confounders, and effect modifiers. Give diagnostic criteria if applicable. | 1                     | 1                    | 1                   |
| 8    | For each variable of interest, give data sources and details of methods of assessment.                                                   | 1                     | 0                    | 1                   |
| 9    | Describe any efforts to address potential sources of bias.                                                                               | 0                     | 0                    | 0                   |
| 10   | Explain how the study size was arrived at.                                                                                               | 1                     | 1                    | 1                   |
| 11   | Explain how quantitative variables were handled in the analyses. If applicable, describe which groupings were chosen and why.            | 0                     | 1                    | 1                   |
| 12   | a                                                                                                                                        | 1                     | 1                    | 1                   |
|      | b                                                                                                                                        | 1                     | 1                    | 1                   |
|      | c                                                                                                                                        | 0                     | 0                    | 0                   |
|      | d                                                                                                                                        | 0                     | 1                    | 0                   |
|      | e                                                                                                                                        | N/A                   | N/A                  | N/A                 |
| 13   | a                                                                                                                                        | 1                     | 0                    | 1                   |
|      | b                                                                                                                                        | 0                     | 0                    | 0                   |
|      | c                                                                                                                                        | 0                     | 0                    | 0                   |
| 14   | a                                                                                                                                        | 1                     | 0                    | 1                   |
|      | b                                                                                                                                        | 0                     | 0                    | 1                   |
|      | c                                                                                                                                        | 1                     | 1                    | 1                   |
| 15   | Report numbers of outcome events or summary measures over time.                                                                          | 1                     | 1                    | 1                   |
| 16   | a                                                                                                                                        | 1                     | 1                    | 1                   |
|      | b                                                                                                                                        | 1                     | 1                    | 1                   |
|      | c                                                                                                                                        | 1                     | 1                    | 1                   |
| 17   | Report other analyses done.                                                                                                              | 1                     | 1                    | 1                   |
| 18   | Summarize key results with reference to study objectives.                                                                                | 1                     | 1                    | 1                   |
| 19   | Discuss limitations of the study, taking into account sources of potential bias or imprecision.                                          | 0                     | 1                    | 0                   |
| 20   | Give a cautious overall interpretation of results.                                                                                       | 1                     | 1                    | 1                   |
| 21   | Discuss generalizability of study results.                                                                                               | 0                     | 0                    | 1                   |
| 22   | Give funding sources.                                                                                                                    | 1                     | 0                    | 1                   |
| Sum  |                                                                                                                                          | 23/32                 | 22/32                | 26/32               |

Appendix C Table 1d. Itemized study reporting criteria according to the STROBE\* statement check list for observational case-control studies utilized in Question 1: "What is the incidence and excess risk of breast cancer following chest radiation for a pediatric or young adult cancer?"

| Item | Item Description | Garwicz<br>2000 (20) | Travis<br>2003 (24) | Travis<br>2005 (23) | Hill<br>2005 (21) | Inskip<br>2009 (22) |
|------|------------------|----------------------|---------------------|---------------------|-------------------|---------------------|
| 1    | a                | 1                    | 1                   | 1                   | 1                 | 1                   |
|      | b                | 1                    | 1                   | 1                   | 1                 | 1                   |
| 2    |                  | 1                    | 1                   | 1                   | 1                 | 1                   |
| 3    |                  | 1                    | 1                   | 1                   | 1                 | 1                   |
| 4    |                  | 1                    | 1                   | 1                   | 1                 | 1                   |
| 5    |                  | 1                    | 1                   | 1                   | 1                 | 1                   |
| 6    | a                | 1                    | 1                   | 1                   | 1                 | 1                   |
|      | b                | 1                    | 1                   | 1                   | 1                 | 1                   |
| 7    |                  | 1                    | 1                   | 1                   | 1                 | 1                   |
| 8    |                  | 1                    | 1                   | 1                   | 1                 | 1                   |
| 9    |                  | 1                    | 0                   | 0                   | 0                 | 0                   |
| 10   |                  | 1                    | 1                   | 1                   | 1                 | 1                   |
| 11   |                  | 1                    | 1                   | 1                   | 1                 | 1                   |
| 12   | a                | 1                    | 1                   | 1                   | 1                 | 1                   |
|      | b                | 1                    | 1                   | 1                   | 1                 | 1                   |
|      | c                | 0                    | 1                   | 0                   | 0                 | 1                   |
|      | d                | 1                    | 1                   | 1                   | 1                 | 1                   |
|      | e                | N/A                  | N/A                 | 1                   | 0                 | 0                   |
| 13   | a                | 1                    | 1                   | 1                   | 1                 | 1                   |
|      | b                | 1                    | 0                   | N/A                 | 1                 | N/A                 |
|      | c                | 0                    | 0                   | 0                   | 0                 | 0                   |
| 14   | a                | 1                    | 1                   | 1                   | 1                 | 1                   |
|      | b                | 1                    | 1                   | 0                   | 1                 | 1                   |
| 15   |                  | 1                    | 1                   | 1                   | 1                 | 1                   |
| 16   | a                | 1                    | 1                   | 1                   | 1                 | 1                   |
|      | b                | 1                    | 1                   | 1                   | 1                 | 1                   |
|      | c                | 0                    | 1                   | 1                   | N/A               | 1                   |
| 17   |                  | 1                    | 1                   | 1                   | 1                 | 1                   |
| 18   |                  | 1                    | 1                   | 1                   | 1                 | 1                   |
| 19   |                  | 1                    | 1                   | 1                   | 0                 | 1                   |
| 20   |                  | 1                    | 1                   | 1                   | 1                 | 1                   |
| 21   |                  | 1                    | 1                   | 1                   | 1                 | 1                   |
| 22   |                  | 1                    | 1                   | 1                   | 1                 | 1                   |
| Sum  |                  | 29/32                | 29/32               | 29/32               | 29/32             | 27/32               |

Appendix C Table 2a. Itemized study reporting criteria according to the STROBE statement check list for observational single institution cohort studies<sup>§</sup> utilized in Question 2: “For these women, are the clinical characteristics of the breast cancer and the outcomes following therapy different than for women with sporadic breast cancer in the general population?”

| Item | Item Description | Gervais-Fagnou 1999 (36) | Wahner-Roedler 2003 (37) | Wolden 2000 (38) | Yahalom 1992 (39) |
|------|------------------|--------------------------|--------------------------|------------------|-------------------|
| 1    | a                | 1                        | 1                        | 0                | 0                 |
|      | b                | 1                        | 1                        | 1                | 1                 |
| 2    |                  | 1                        | 1                        | 1                | 1                 |
| 3    |                  | 1                        | 1                        | 1                | 1                 |
| 4    |                  | 1                        | 1                        | 1                | 1                 |
| 5    |                  | 1                        | 1                        | 1                | 1                 |
| 6    | a                | 1                        | 1                        | 1                | 1                 |
|      | b                | N/A                      | N/A                      | N/A              | N/A               |
| 7    |                  | 0                        | 0                        | 1                | 1                 |
| 8    |                  | 1                        | 1                        | 1                | 1                 |
| 9    |                  | 0                        | 1                        | 0                | 0                 |
| 10   |                  | 1                        | 1                        | 1                | 1                 |
| 11   |                  | 0                        | 1                        | 0                | 1                 |
| 12   | a                | 1                        | 1                        | 1                | 1                 |
|      | b                | N/A                      | 1                        | 1                | 1                 |
|      | c                | 0                        | 0                        | 0                | 0                 |
|      | d                | 0                        | 0                        | 1                | 0                 |
|      | e                | N/A                      | 0                        | N/A              | N/A               |
| 13   | a                | 1                        | 1                        | 0                | 1                 |
|      | b                | N/A                      | 1                        | N/A              | 1                 |
|      | c                | 0                        | 0                        | 0                | 0                 |
| 14   | a                | 1                        | 1                        | 1                | 1                 |
|      | b                | 1                        | 1                        | 0                | 1                 |
|      | c                | 1                        | 1                        | 1                | 1                 |
| 15   |                  | 1                        | 1                        | 1                | 1                 |
| 16   | a                | 1                        | 1                        | 1                | 1                 |
|      | b                | 1                        | 1                        | 1                | 1                 |
|      | c                | 1                        | 1                        | 1                | 1                 |
| 17   |                  | 1                        | 1                        | 1                | 1                 |
| 18   |                  | 1                        | 1                        | 1                | 1                 |
| 19   |                  | 0                        | 1                        | 0                | 0                 |
| 20   |                  | 1                        | 1                        | 1                | 1                 |
| 21   |                  | 0                        | 0                        | 0                | 0                 |
| 22   |                  | 0                        | 0                        | 0                | 1                 |
| Sum  |                  | 21/30                    | 26/33                    | 21/31            | 25/32             |

<sup>§</sup> Also included in question 2, were references 12, 13, 16 which are described for Question 1 above.

Appendix C Table 2b. Itemized study reporting criteria according to the STROBE statement check list for observational multiple institution cohort studies utilized in Question 2: “For these women, are the clinical characteristics of the breast cancer and the outcomes following therapy different than for women with sporadic breast cancer in the general population?”

| Item | Item Description                                                                                                                         | Cutuli 2001 (35) |
|------|------------------------------------------------------------------------------------------------------------------------------------------|------------------|
| 1    | a Study's design clear in title or abstract.                                                                                             | 1                |
|      | b Abstract has an informative and balanced summary of study.                                                                             | 1                |
| 2    | Explain the scientific background and rationale for the investigation being reported.                                                    | 1                |
| 3    | State specific objectives including any prespecified hypotheses.                                                                         | 1                |
| 4    | Present key elements of study design early in the paper.                                                                                 | 1                |
| 5    | Describe the setting, locations, and relevant dates, including periods of recruitment, exposure, follow-up and data.                     | 1                |
| 6    | a Give the eligibility criteria, and the sources and methods of selection of participants. Describe methods of follow up.                | 1                |
|      | b For matched studies, give matching criteria and number of exposed and unexposed.                                                       | N/A              |
| 7    | Clearly define all outcomes, exposures, predictors, potential confounders, and effect modifiers. Give diagnostic criteria if applicable. | 1                |
| 8    | For each variable of interest, give data sources and details of methods of assessment.                                                   | 1                |
| 9    | Describe any efforts to address potential sources of bias.                                                                               | 0                |
| 10   | Explain how the study size was arrived at.                                                                                               | 1                |
| 11   | Explain how quantitative variables were handled in the analyses. If applicable, describe which groupings were chosen and why.            | 1                |
| 12   | a Describe all statistical methods.                                                                                                      | 1                |
|      | b Describe any methods used to examine subgroups and interactions.                                                                       | 0                |
|      | c Explain how missing data was addressed.                                                                                                | 0                |
|      | d Cohort study: Explain how loss to follow-up was addressed.                                                                             | 0                |
|      | e Describe any sensitivity analyses.                                                                                                     | N/A              |
| 13   | a Report the number of individuals at each stage of study.                                                                               | 0                |
|      | b Give reasons for non-participation at each stage.                                                                                      | N/A              |
|      | c Consider use of a flow diagram.                                                                                                        | 0                |
| 14   | a Give characteristics of study participants and information on exposures and potential confounders.                                     | 1                |
|      | b Indicate the number of participants with missing data for each variable of interest.                                                   | 1                |
|      | c Summarize follow-up time.                                                                                                              | 1                |
| 15   | Report numbers of outcome events or summary measures over time.                                                                          | 1                |
| 16   | a Give unadjusted estimates and, if applicable, confounder-adjusted estimates and their precision.                                       | 1                |
|      | b Report category boundaries when continuous variables were categorized.                                                                 | 1                |
|      | c If relevant, consider translating estimates of relative risk into absolute risk for a meaningful time period.                          | 1                |
| 17   | Report other analyses done.                                                                                                              | 1                |
| 18   | Summarize key results with reference to study objectives.                                                                                | 1                |
| 19   | Discuss limitations of the study, taking into account sources of potential bias or imprecision.                                          | 0                |
| 20   | Give a cautious overall interpretation of results.                                                                                       | 1                |
| 21   | Discuss generalizability of study results.                                                                                               | 0                |
| 22   | Give funding sources.                                                                                                                    | 0                |
| Sum  |                                                                                                                                          | 22/31            |



Appendix C Table 2c. Itemized study reporting criteria according to the STROBE statement check list for observational case-control studies utilized in Question 2: “For these women, are the clinical characteristics of the breast cancer and the outcomes following therapy different than for women with sporadic breast cancer in the general population?”

| Item | Item Description                                                                                                                         | Janov<br>2001 (41) | Sanna<br>2007 (42) |
|------|------------------------------------------------------------------------------------------------------------------------------------------|--------------------|--------------------|
| 1    | a                                                                                                                                        | 1                  | 0                  |
|      | b                                                                                                                                        | 1                  | 1                  |
| 2    | Explain the scientific background and rationale for the investigation being reported.                                                    | 1                  | 1                  |
| 3    | State specific objectives including any prespecified hypotheses.                                                                         | 1                  | 1                  |
| 4    | Present key elements of study design early in the paper.                                                                                 | 1                  | 1                  |
| 5    | Describe the setting, locations, and relevant dates, including periods of recruitment, exposure, follow-up and data.                     | 1                  | 1                  |
| 6    | a                                                                                                                                        | 1                  | 1                  |
|      | b                                                                                                                                        | 1                  | 1                  |
| 7    | Clearly define all outcomes, exposures, predictors, potential confounders, and effect modifiers. Give diagnostic criteria if applicable. | 1                  | 0                  |
| 8    | For each variable of interest, give data sources and details of methods of assessment.                                                   | 1                  | 1                  |
| 9    | Describe any efforts to address potential sources of bias.                                                                               | 0                  | 0                  |
| 10   | Explain how the study size was arrived at.                                                                                               | 1                  | 1                  |
| 11   | Explain how quantitative variables were handled in the analyses. If applicable, describe which groupings were chosen and why.            | 0                  | 1                  |
| 12   | a                                                                                                                                        | 1                  | 1                  |
|      | b                                                                                                                                        | N/A                | 0                  |
|      | c                                                                                                                                        | 0                  | 0                  |
|      | d                                                                                                                                        | 1                  | 1                  |
|      | e                                                                                                                                        | N/A                | N/A                |
| 13   | a                                                                                                                                        | 1                  | 1                  |
|      | b                                                                                                                                        | 1                  | N/A                |
|      | c                                                                                                                                        | 0                  | 0                  |
| 14   | a                                                                                                                                        | 1                  | 1                  |
|      | b                                                                                                                                        | 1                  | 1                  |
| 15   | Report numbers in each exposure category or summary measures of exposure.                                                                | 1                  | 1                  |
| 16   | a                                                                                                                                        | 1                  | 1                  |
|      | b                                                                                                                                        | 1                  | 1                  |
|      | c                                                                                                                                        | 1                  | 1                  |
| 17   | Report other analyses done.                                                                                                              | 1                  | 1                  |
| 18   | Summarize key results with reference to study objectives.                                                                                | 1                  | 1                  |
| 19   | Discuss limitations of the study, taking into account sources of potential bias or imprecision.                                          | 0                  | 0                  |
| 20   | Give a cautious overall interpretation of results.                                                                                       | 1                  | 1                  |
| 21   | Discuss generalizability of study results.                                                                                               | 0                  | 0                  |
| 22   | Give funding sources.                                                                                                                    | 0                  | 0                  |
| Sum  |                                                                                                                                          | 25/31              | 22/31              |

Appendix C Table 3a. Itemized study reporting criteria according to the STROBE statement check list for retrospective observational studies<sup>#</sup> utilized in Question 3: “What are the potential benefits and harms associated with breast cancer surveillance among women exposed to chest radiation?”

| Item | Item Description                                                                                                                                                                                                                                                          | Dershaw<br>1992 (46) |
|------|---------------------------------------------------------------------------------------------------------------------------------------------------------------------------------------------------------------------------------------------------------------------------|----------------------|
| 1    | a Study's design clear in title or abstract.                                                                                                                                                                                                                              | 1                    |
|      | b Abstract has an informative and balanced summary of study.                                                                                                                                                                                                              | 1                    |
| 2    | Explain the scientific background and rationale for the investigation being reported.                                                                                                                                                                                     | 1                    |
| 3    | State specific objectives including any prespecified hypotheses.                                                                                                                                                                                                          | 1                    |
| 4    | Present key elements of study design early in the paper.                                                                                                                                                                                                                  | 1                    |
| 5    | Describe the setting, locations, and relevant dates, including periods of recruitment, exposure, follow-up and data.                                                                                                                                                      | 0                    |
| 6    | a Cohort study: give the eligibility criteria, and the sources and methods of selection of participants. Describe methods of follow up.                                                                                                                                   | 1                    |
|      | b For matched studies, give matching criteria and number of exposed and unexposed.                                                                                                                                                                                        | N/A                  |
| 7    | Clearly define all outcomes, exposures, predictors, potential confounders, and effect modifiers. Give diagnostic criteria if applicable.                                                                                                                                  | 0                    |
| 8    | For each variable of interest, give data sources and details of methods of assessment.                                                                                                                                                                                    | 1                    |
| 9    | Describe any efforts to address potential sources of bias.                                                                                                                                                                                                                | 0                    |
| 10   | Explain how the study size was arrived at.                                                                                                                                                                                                                                | 1                    |
| 11   | Explain how quantitative variables were handled in the analyses. If applicable, describe which groupings were chosen and why.                                                                                                                                             | 0                    |
| 12   | a Describe all statistical methods.                                                                                                                                                                                                                                       | 0                    |
|      | b Describe any methods used to examine subgroups and interactions.                                                                                                                                                                                                        | 0                    |
|      | c Explain how missing data was addressed.                                                                                                                                                                                                                                 | 0                    |
|      | d Cohort study: If applicable, explain how loss to follow-up was addressed.<br>Case-control: If applicable, explain how matching of cases and controls was addressed.<br>Cross-sectional: If applicable, describe analytical methods taking account of sampling strategy. | N/A                  |
|      | e Describe any sensitivity analyses.                                                                                                                                                                                                                                      | N/A                  |
| 13   | a Report the number of individuals at each stage of study.                                                                                                                                                                                                                | 0                    |
|      | b Give reasons for non-participation at each stage.                                                                                                                                                                                                                       | N/A                  |
|      | c Consider use of a flow diagram.                                                                                                                                                                                                                                         | 0                    |
| 14   | a Give characteristics of study participants and information on exposures and potential confounders.                                                                                                                                                                      | 1                    |
|      | b Indicate the number of participants with missing data for each variable of interest.                                                                                                                                                                                    | 0                    |
|      | c Cohort study: Summarize follow-up time.                                                                                                                                                                                                                                 | 1                    |
| 15   | Report numbers of outcome events or summary measures over time.                                                                                                                                                                                                           | 1                    |
| 16   | a Give unadjusted estimates and, if applicable, confounder-adjusted estimates and their precision.                                                                                                                                                                        | N/A                  |
|      | b Report category boundaries when continuous variables were categorized.                                                                                                                                                                                                  | N/A                  |
|      | c If relevant, consider translating estimates of relative risk into absolute risk for a meaningful time period.                                                                                                                                                           | N/A                  |
| 17   | Report other analyses done.                                                                                                                                                                                                                                               | 1                    |
| 18   | Summarize key results with reference to study objectives.                                                                                                                                                                                                                 | 1                    |
| 19   | Discuss limitations of the study, taking into account sources of potential bias or imprecision.                                                                                                                                                                           | 0                    |
| 20   | Give a cautious overall interpretation of results.                                                                                                                                                                                                                        | 1                    |
| 21   | Discuss generalizability of study results.                                                                                                                                                                                                                                | 0                    |
| 22   | Give funding sources.                                                                                                                                                                                                                                                     | 0                    |
| Sum  |                                                                                                                                                                                                                                                                           | 14/27                |

<sup>#</sup> Also included in question 3, were references 38 which is described for Question 2 above.

Appendix C Table 3b. Itemized study reporting criteria according to the STROBE statement check list for prospective observational studies utilized in Question 3: "What are the potential benefits and harms associated with breast cancer surveillance among women exposed to chest radiation?"

| Item | Item Description                                                                                                                                                                                                                                                          | Diller 2002 (47) | Kwong 2008 (48) | Lee 2008 (49) |
|------|---------------------------------------------------------------------------------------------------------------------------------------------------------------------------------------------------------------------------------------------------------------------------|------------------|-----------------|---------------|
| 1    | a Study's design clear in title or abstract.                                                                                                                                                                                                                              | 1                | 0               | 1             |
|      | b Abstract has an informative and balanced summary of study.                                                                                                                                                                                                              | 1                | 1               | 1             |
| 2    | Explain the scientific background and rationale for the investigation being reported.                                                                                                                                                                                     | 1                | 1               | 1             |
| 3    | State specific objectives including any prespecified hypotheses.                                                                                                                                                                                                          | 1                | 1               | 1             |
| 4    | Present key elements of study design early in the paper.                                                                                                                                                                                                                  | 1                | 1               | 1             |
| 5    | Describe the setting, locations, and relevant dates, including periods of recruitment, exposure, follow-up and data.                                                                                                                                                      | 1                | 0               | 1             |
| 6    | a Cohort study: give the eligibility criteria, and the sources and methods of selection of participants. Describe methods of follow up.                                                                                                                                   | 1                | 1               | 1             |
|      | b For matched studies, give matching criteria and number of exposed and unexposed.                                                                                                                                                                                        | N/A              | N/A             | N/A           |
| 7    | Clearly define all outcomes, exposures, predictors, potential confounders, and effect modifiers. Give diagnostic criteria if applicable.                                                                                                                                  | 1                | 1               | 0             |
| 8    | For each variable of interest, give data sources and details of methods of assessment.                                                                                                                                                                                    | 1                | 1               | 1             |
| 9    | Describe any efforts to address potential sources of bias.                                                                                                                                                                                                                | 0                | 0               | 0             |
| 10   | Explain how the study size was arrived at.                                                                                                                                                                                                                                | 1                | 1               | 1             |
| 11   | Explain how quantitative variables were handled in the analyses. If applicable, describe which groupings were chosen and why.                                                                                                                                             | 1                | 1               | 1             |
| 12   | a Describe all statistical methods.                                                                                                                                                                                                                                       | 1                | 1               | 1             |
|      | b Describe any methods used to examine subgroups and interactions.                                                                                                                                                                                                        | 1                | 0               | 1             |
|      | c Explain how missing data was addressed.                                                                                                                                                                                                                                 | 0                | 0               | 0             |
|      | d Cohort study: If applicable, explain how loss to follow-up was addressed.<br>Case-control: If applicable, explain how matching of cases and controls was addressed.<br>Cross-sectional: If applicable, describe analytical methods taking account of sampling strategy. | 0                | N/A             | 0             |
|      | e Describe any sensitivity analyses.                                                                                                                                                                                                                                      | N/A              | N/A             | N/A           |
| 13   | a Report the number of individuals at each stage of study.                                                                                                                                                                                                                | 1                | 1               | 1             |
|      | b Give reasons for non-participation at each stage.                                                                                                                                                                                                                       | 0                | 1               | 0             |
|      | c Consider use of a flow diagram.                                                                                                                                                                                                                                         | 0                | 0               | 0             |
| 14   | a Give characteristics of study participants and information on exposures and potential confounders.                                                                                                                                                                      | 1                | 1               | 1             |
|      | b Indicate the number of participants with missing data for each variable of interest.                                                                                                                                                                                    | 1                | 1               | 1             |
|      | c Cohort study: Summarize follow-up time.                                                                                                                                                                                                                                 | 1                | N/A             | 1             |
| 15   | Report numbers of outcome events or summary measures over time.                                                                                                                                                                                                           | 1                | 1               | 1             |
| 16   | a Give unadjusted estimates and, if applicable, confounder-adjusted estimates and their precision.                                                                                                                                                                        | 1                | N/A             | 1             |
|      | b Report category boundaries when continuous variables were categorized.                                                                                                                                                                                                  | 1                | N/A             | 1             |
|      | c If relevant, consider translating estimates of relative risk into absolute risk for a meaningful time period.                                                                                                                                                           | 1                | N/A             | 1             |
| 17   | Report other analyses done.                                                                                                                                                                                                                                               | 1                | 1               | 1             |
| 18   | Summarize key results with reference to study objectives.                                                                                                                                                                                                                 | 1                | 1               | 1             |
| 19   | Discuss limitations of the study, taking into account sources of potential bias or imprecision.                                                                                                                                                                           | 0                | 1               | 1             |
| 20   | Give a cautious overall interpretation of results.                                                                                                                                                                                                                        | 1                | 1               | 1             |
| 21   | Discuss generalizability of study results.                                                                                                                                                                                                                                | 1                | 0               | 1             |
| 22   | Give funding sources.                                                                                                                                                                                                                                                     | 1                | 1               | 0             |
| Sum  |                                                                                                                                                                                                                                                                           | 26/32            | 20/27           | 25/32         |
